# Supplementary material for: From batch to flow: the effect of pH, current, and the crystal facets of Cu2O on electrochemical CO2 reduction
Source: Royal Society of Chemistry journal article supplement (doi:10.1039/d4se00130c), 2024-01-01
Supplement: d4se00130c1.pdf [file d4se00130c1.pdf]

# From batch to flow: the effect of pH, current, and crystal facets of Cu<sub>2</sub>O on the electrochemical CO<sub>2</sub> reduction

*Mathias van der Veer<sup>a,b</sup>, Nick Daems<sup>a</sup>, Pegie Cool<sup>b</sup>, and Tom Breugelmans<sup>a</sup>*

## Supporting Information

<sup>a</sup> Applied Electrochemistry and Catalysis (ELCAT), University of Antwerp, Campus Drie Eiken, Universiteitsplein 1, 2610 Wilrijk, Belgium

<sup>b</sup> Laboratory of Adsorption and Catalysis (LADCA), University of Antwerp, Campus Drie Eiken, Universiteitsplein 1, 2610 Wilrijk, Belgium

### Keywords

CO<sub>2</sub> to C<sub>2+</sub> products, flow electrolyzer, crystal facets, Cu<sub>2</sub>O nanocrystals, pH and current effect, electrode stability

## Table of content:

**Figure S1.** In situ Raman flow cell setup

**Figure S2.** Schematic view of our flow cell setup

**Figure S3.** SEM of Cu<sub>2</sub>O-NF

**Figure S4.** TEM of Cu<sub>2</sub>O-NF

**Figure S5.** Particle size distribution of Cu<sub>2</sub>O-NC

**Figure S6.** Raman spectrums of Cu<sub>2</sub>O-Octahedral, nanoflowers, and nanocubes respectively

**Figure S7.** XPS images of the different Cu<sub>2</sub>O catalysts: (a) Survey profiles, (b) Cu 2p spectra, (c) Cu LM2 spectra, and (d) O 1s spectra.

**Figure S8.** All of the following CVs were measured  $\pm 50$  mV from OCP with scan rates of 25-50-75-100-125 mV s<sup>-1</sup>. a) Cu<sub>2</sub>O-O, b) Cu<sub>2</sub>O-NF, c) Cu<sub>2</sub>O-NC, d) Cu<sub>2</sub>O-O After, e) Cu<sub>2</sub>O-NF after, f) Cu<sub>2</sub>O-NC After, and g) Linear fit of calculated ECSA, Starting bottom to top, The ECSA of Cu<sub>2</sub>O-O (2.44 mF), Cu<sub>2</sub>O-NF (4.58 mF), Cu<sub>2</sub>O-NC (6.13 mF), Cu<sub>2</sub>O-O After (10.69 mF), Cu<sub>2</sub>O-NF (17.61 mF), and Cu<sub>2</sub>O-NC (22.16 mF)

**Figure S9.** CO<sub>2</sub>RR at 150 mA cm<sup>-2</sup> with Cu<sub>2</sub>O-NC for different flow rates at pH 11

**Figure S10.** CO<sub>2</sub>RR at 300 mA cm<sup>-2</sup> with Cu<sub>2</sub>O-NC for 1 hour at pH 8.5

**Figure S11.** Long term stability test of Cu<sub>2</sub>O-NF, performed at 150 mA cm<sup>-2</sup> and pH 8.5. The different products are represented at each time interval along with total C<sub>2+</sub> FE.

**Figure S12.** Contact angle measurements, off fresh and spent electrolyte on fresh and spent GDE

**Figure S13.** Contact angle measurements, on a) GDE coated Cu<sub>2</sub>O-NC before electrolysis, and b) GDE coated Cu<sub>2</sub>O-NC after electrolysis at 150 mA cm<sup>-2</sup>. Both were measured after 5 seconds of droplet aging

**Figure S14.** Long-term stability measurement with single pass 0.5 M KHCO<sub>3</sub> catholyte

**Figure S15.** SEM measurements for Cu<sub>2</sub>O-NC, a) before electrolysis, and b) after electrolysis, with arrows indicating the roughening

**Figure S16.** XRD spectra taken after electrolysis on GDE compared to the original powder. Spectra given after electrolysis of the different current densities. a) Cu<sub>2</sub>O-NC, b) Cu<sub>2</sub>O-NF, and Cu<sub>2</sub>O-O

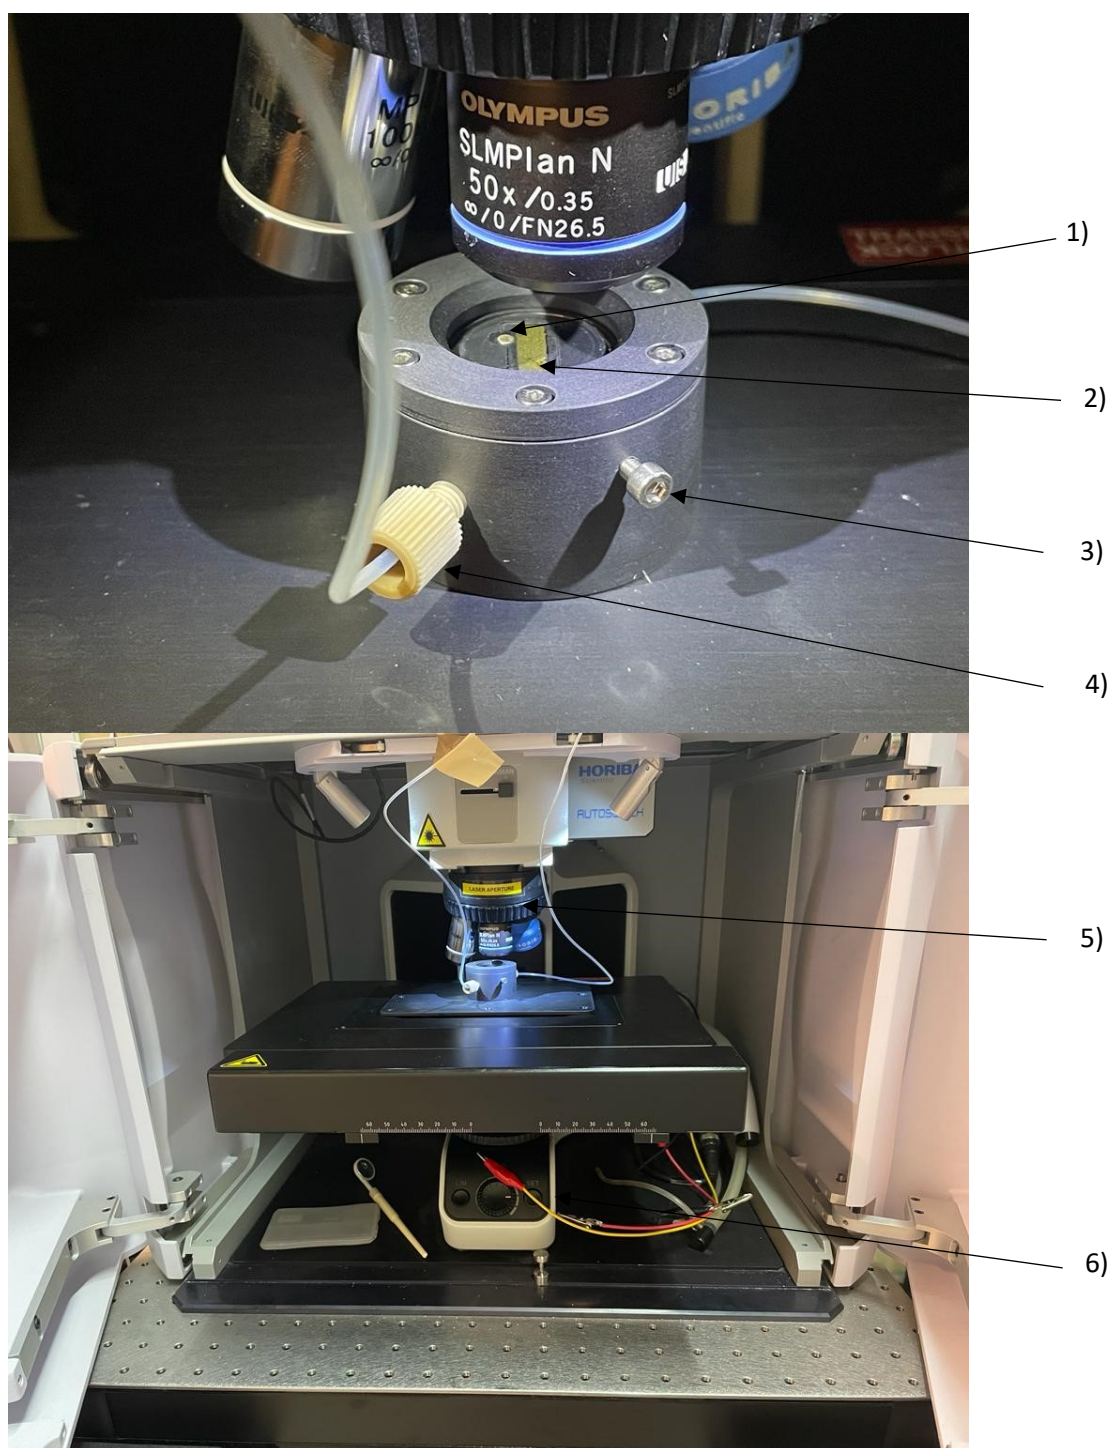

**Figure S1.** In situ Raman flow setup. 1) reference electrode Ag/AgCl, 2) GDE as working electrode with gold finger, 3) connection to working electrode, 4) flow channels for electrolyte, 5) Raman laser, and 6) electrical connections to reference- and counter electrode.

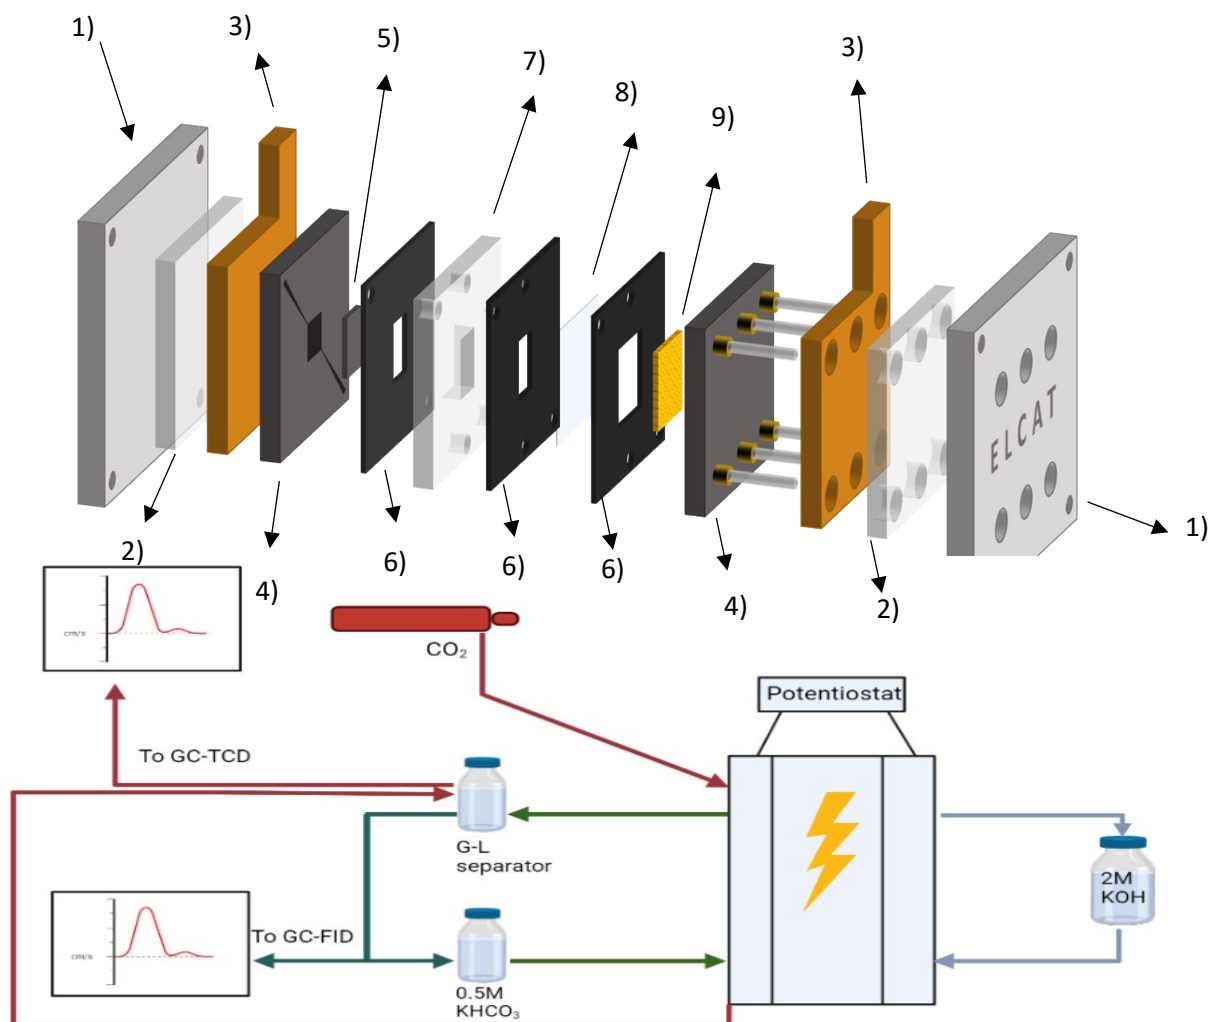

**Figure S2.** A schematic view of the electrochemical CO<sub>2</sub> reduction, along with an in depth depiction of the flow cell. 1) Aluminum plates, 2) PMMA isolation plates, 3) Conductive copper plates, 4) Flat designed graphite substrate plates without vortex generators, 5) Catalyst coated GDE, 6) Rubber gaskets, 7) Reference electrode holder, 8) Nafion 117 membrane, and 9) Nickel foam anode

Liquid samples for the detection of alcohols were prepared as follows: 1 mL of sample was added to a vial with 100  $\mu$ L 1% Butanol as Internal standard (IS), which was uniformly mixed. Another vial was prepared which contained 100  $\mu$ L of IS, 1% ethanol, and 1% 1-propanol, diluted with water to a total volume of 1.1 mL. The areas of the standard mixture were used to calculate the amount of ppm of product present in the sample, the internal standard was used for the correction. Based on the ppm, the faradaic efficiency was calculated. For the detection of formic acid, 1 mL of sample was combined with 1 mL of 1.2 M of HClO<sub>4</sub> to precipitate the salts. Then, 1 mL of this mixture was analyzed with HPLC (Diluted x2) and compared with a standard of 100 ppm formic acid.

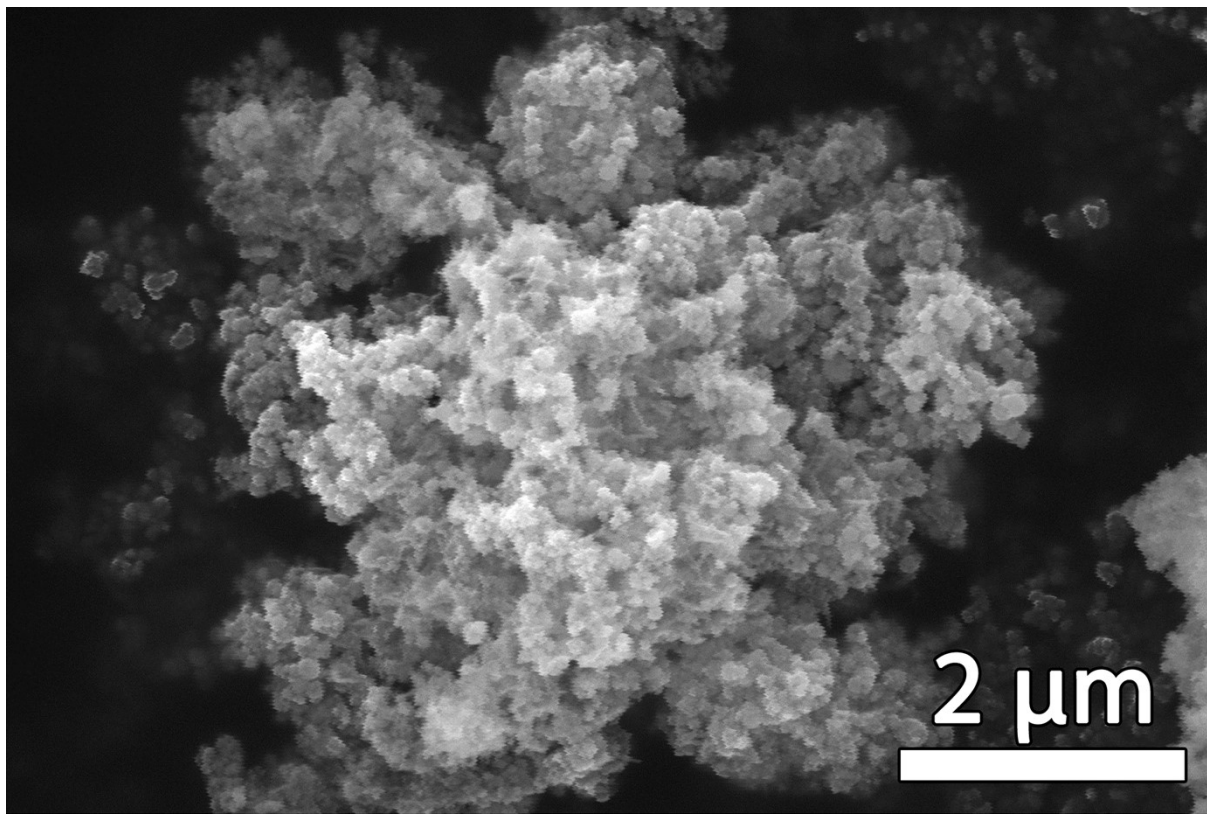

**Figure S3.** SEM image of Cu<sub>2</sub>O-NF

a)

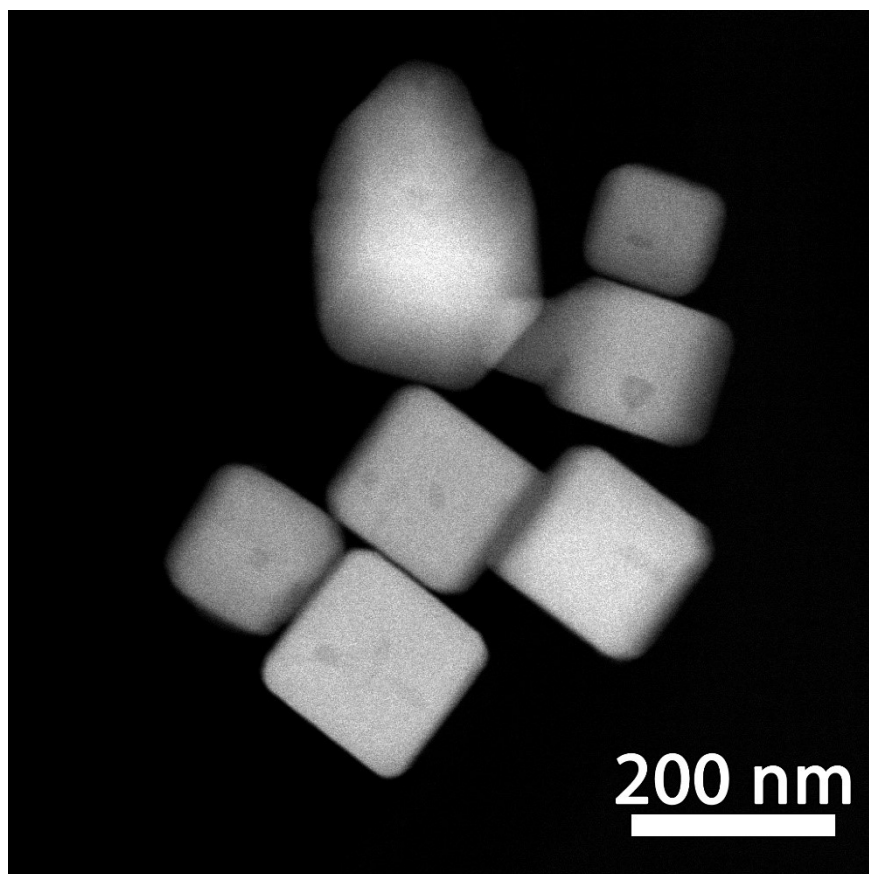

b)

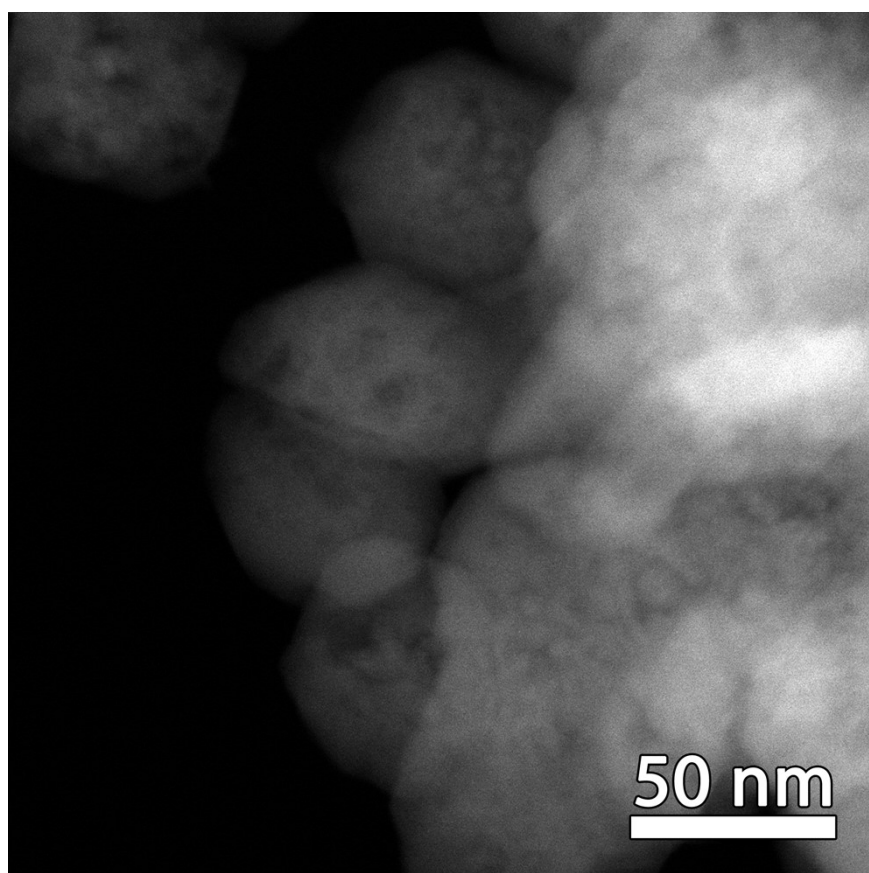

**Figure S4.** TEM images of a) Cu<sub>2</sub>O-NC, and b) Cu<sub>2</sub>O-NF

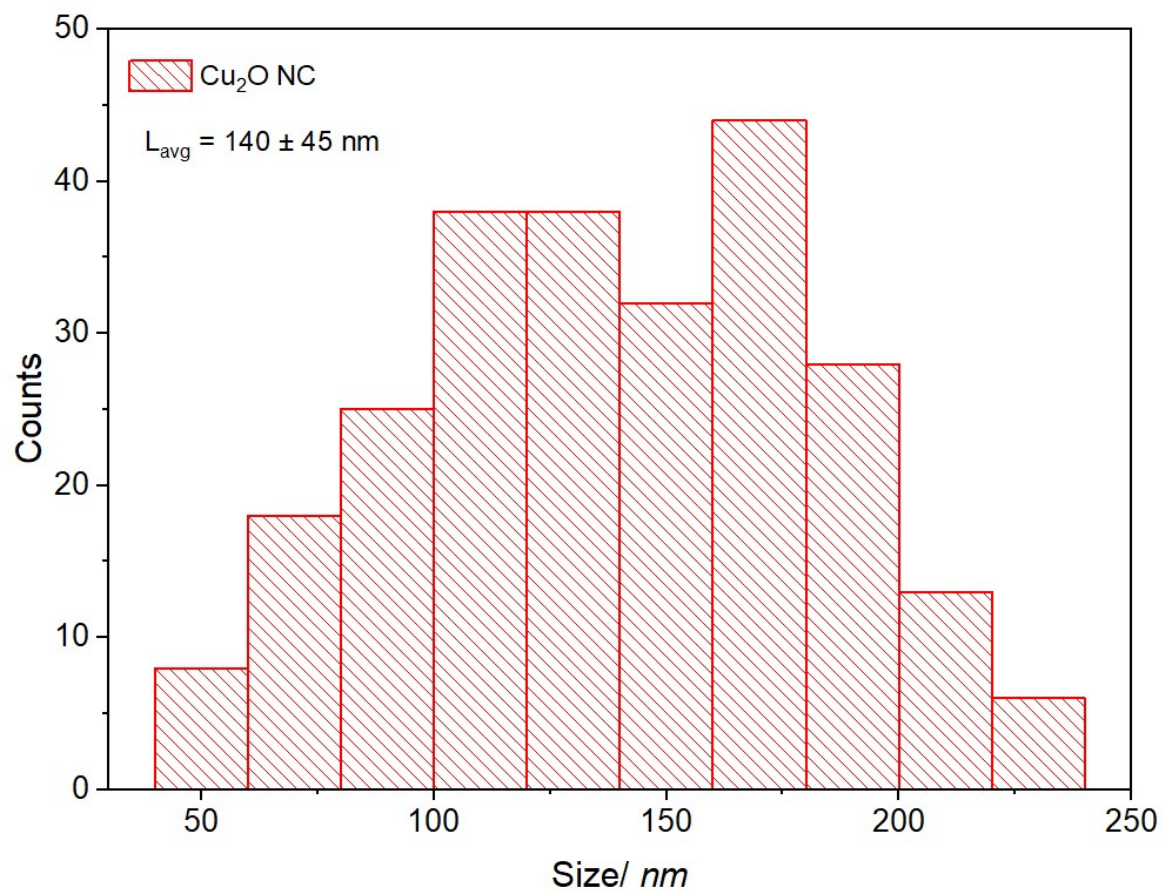

**Figure S5.** Particle size distribution histogram of Cu<sub>2</sub>O-NC, 300 particles were used for the calculations, with the edge length as the value that was used for calculating the size.

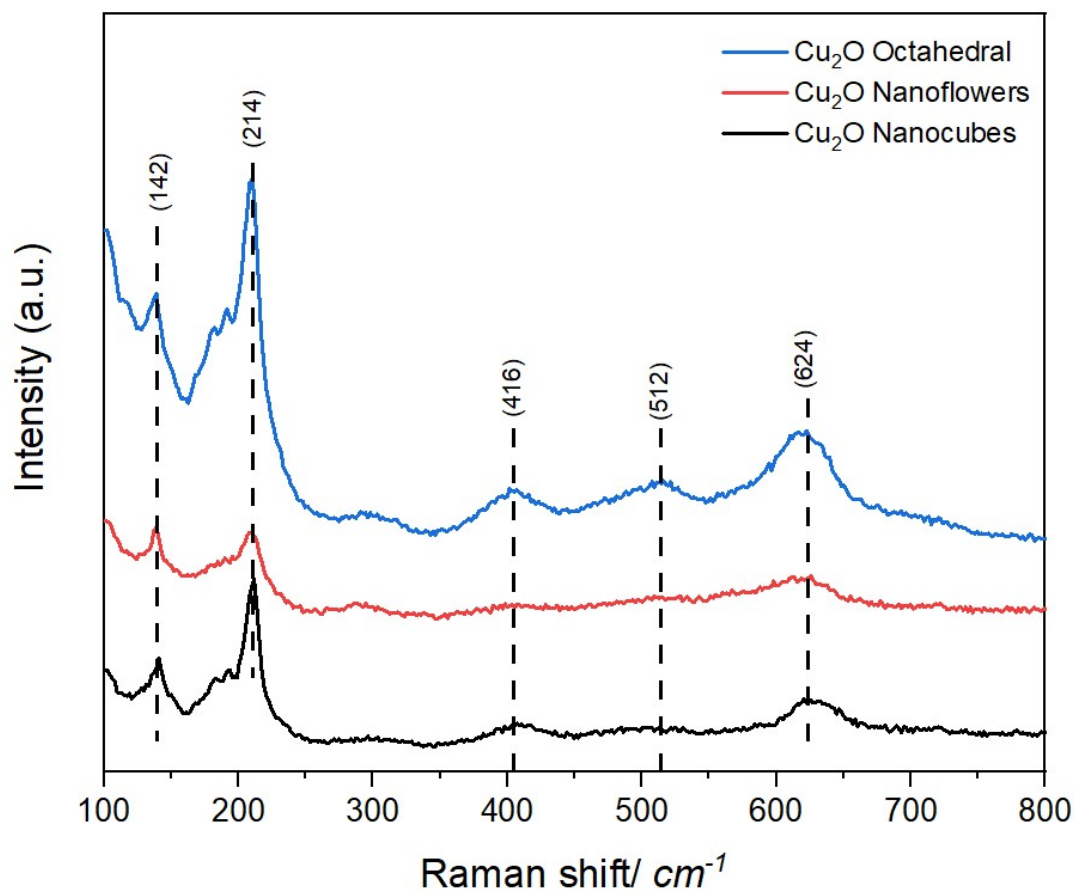

**Figure S6.** Raman spectrums of Cu<sub>2</sub>O-Octahedral, nanoflowers, and nanocubes respectively



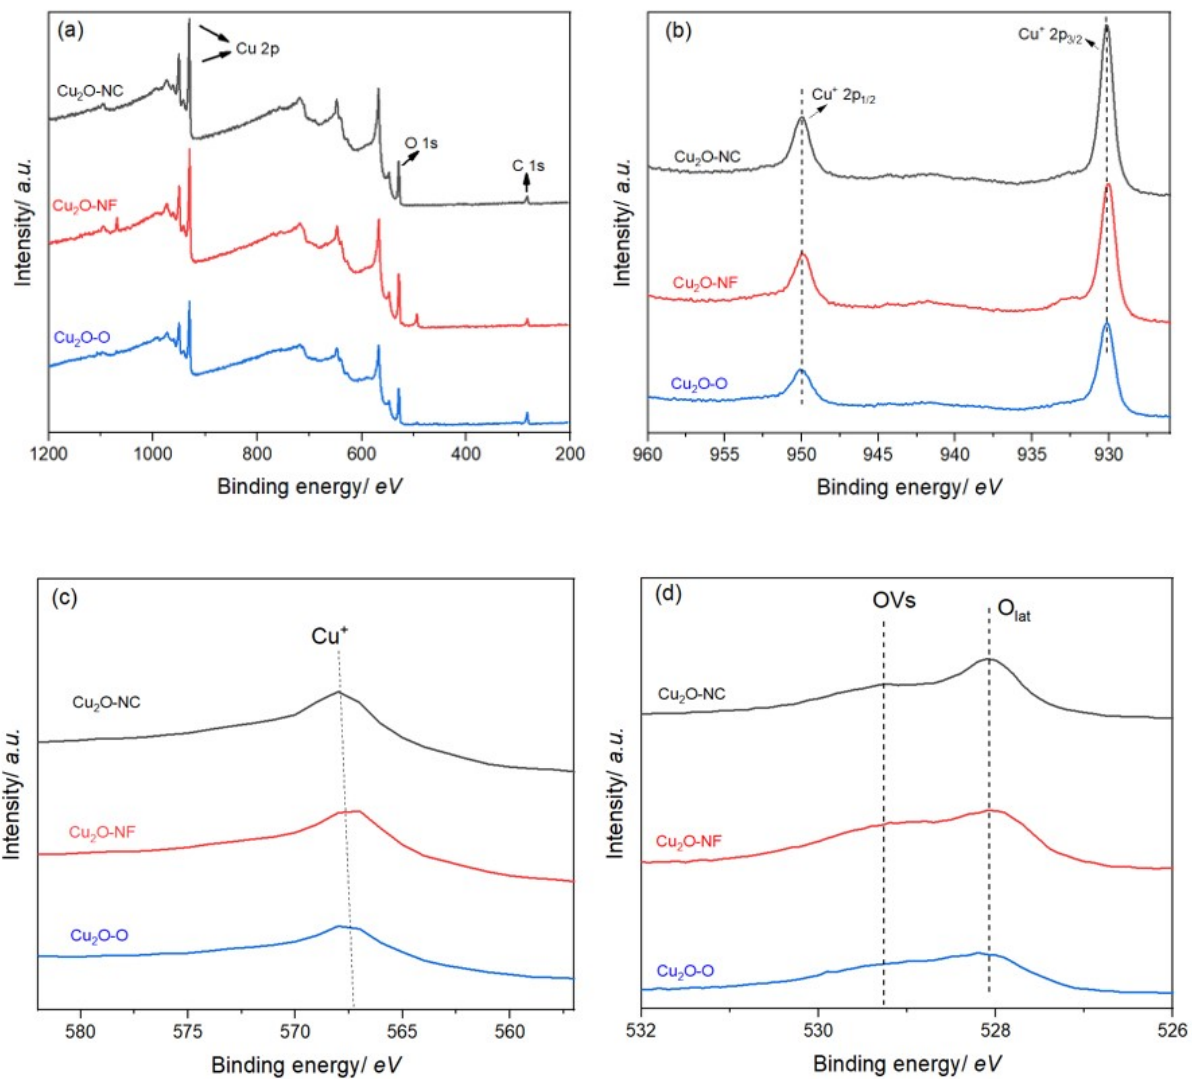

**Figure S7.** XPS images of the different Cu<sub>2</sub>O catalysts: (a) Survey profiles, (b) Cu 2p spectra, (c) Cu LM2 spectra, and (d) O 1s spectra.

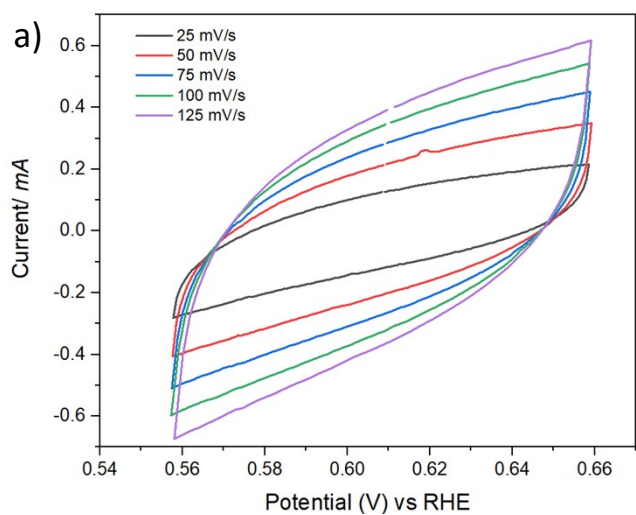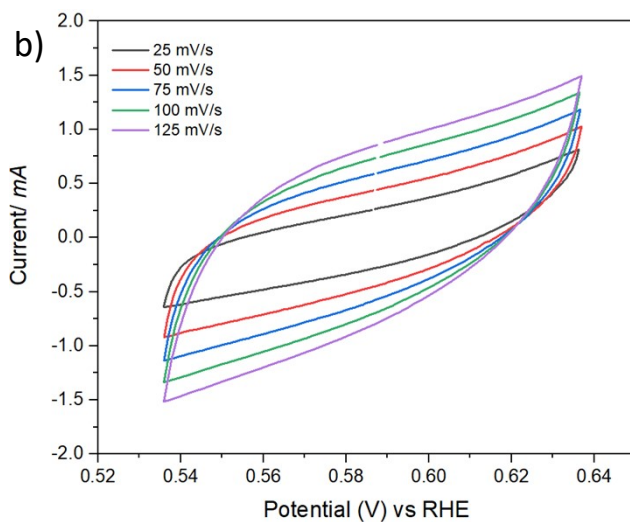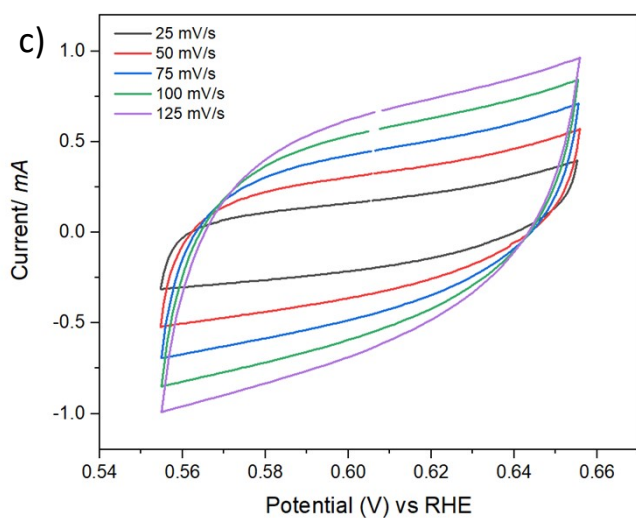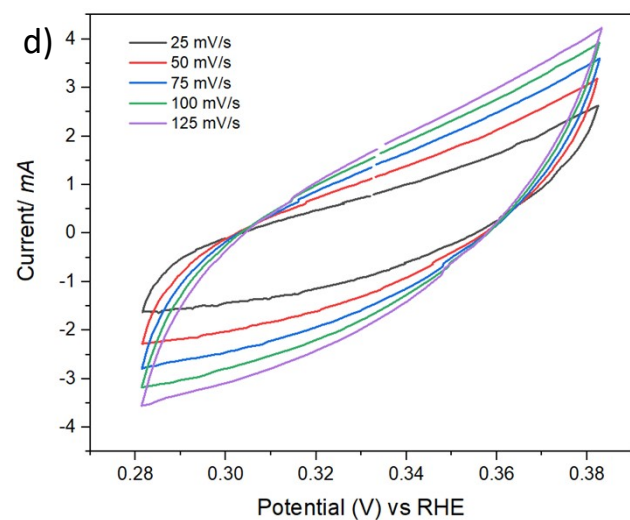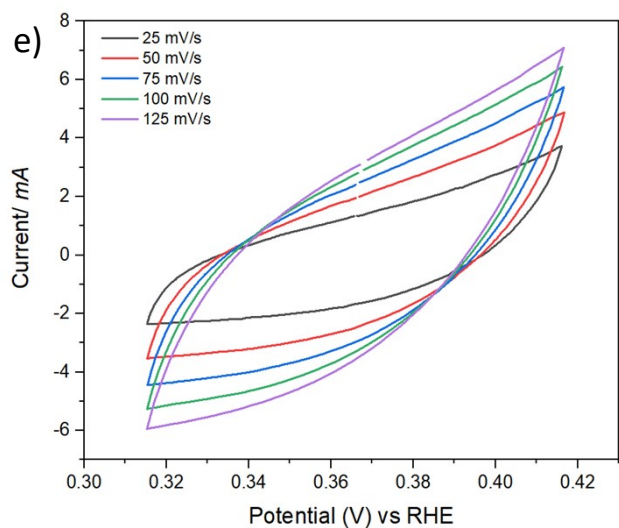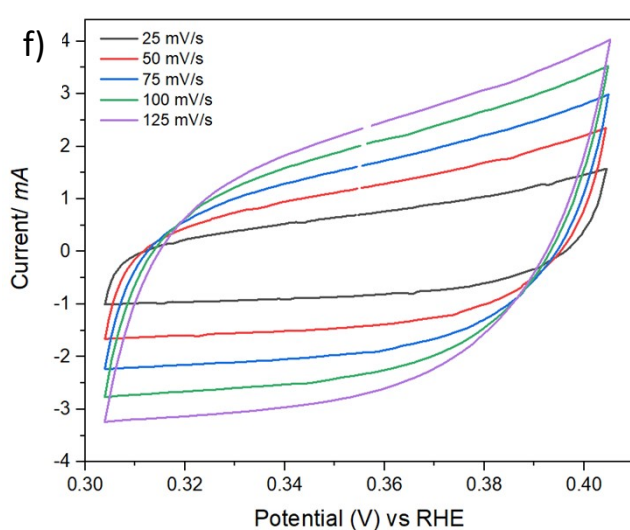

g)

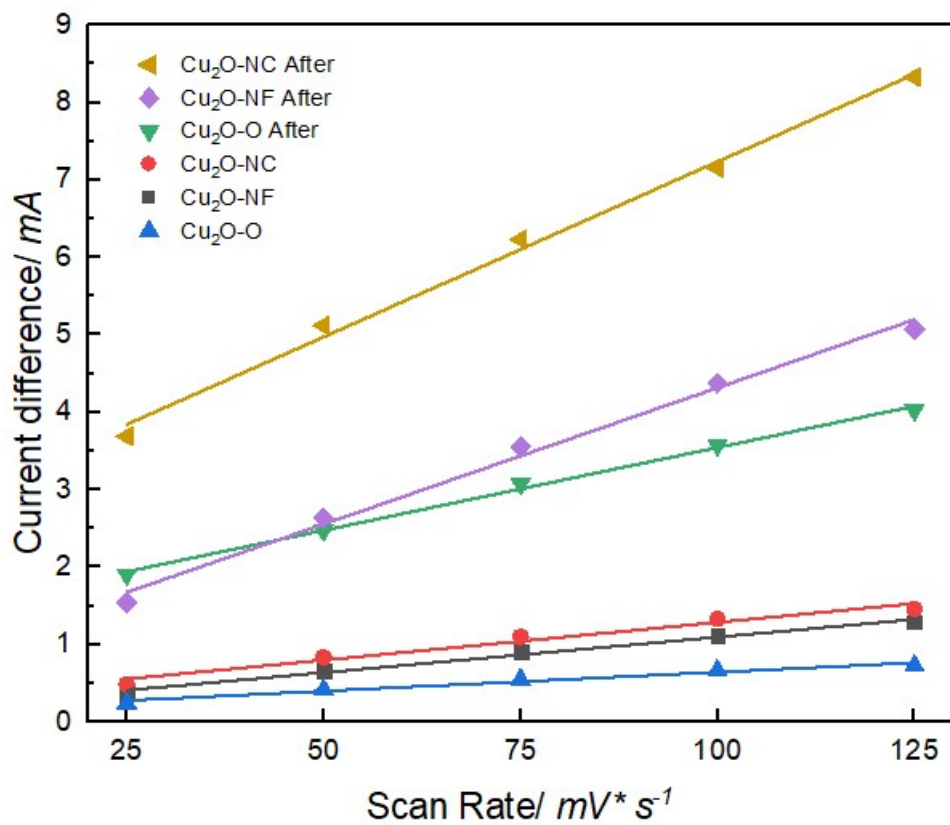

**Figure S8.** All of the following CVs were measured  $\pm 50$  mV from OCP with scan rates of 25-50-75-100-125  $mV s^{-1}$ . a) Cu<sub>2</sub>O-O, b) Cu<sub>2</sub>O-NF, c) Cu<sub>2</sub>O-NC, d) Cu<sub>2</sub>O-O After, e) Cu<sub>2</sub>O-NF after, f) Cu<sub>2</sub>O-NC After, and g) Linear fit of calculated ECSA, Starting bottom to top, The ECSA of Cu<sub>2</sub>O-O (5.21 mF), Cu<sub>2</sub>O-NF (9.7 mF), Cu<sub>2</sub>O-NC (11.29 mF), Cu<sub>2</sub>O-O After (21.38 mF), Cu<sub>2</sub>O-NF (35.23 mF), and Cu<sub>2</sub>O-NC (45.25 mF)

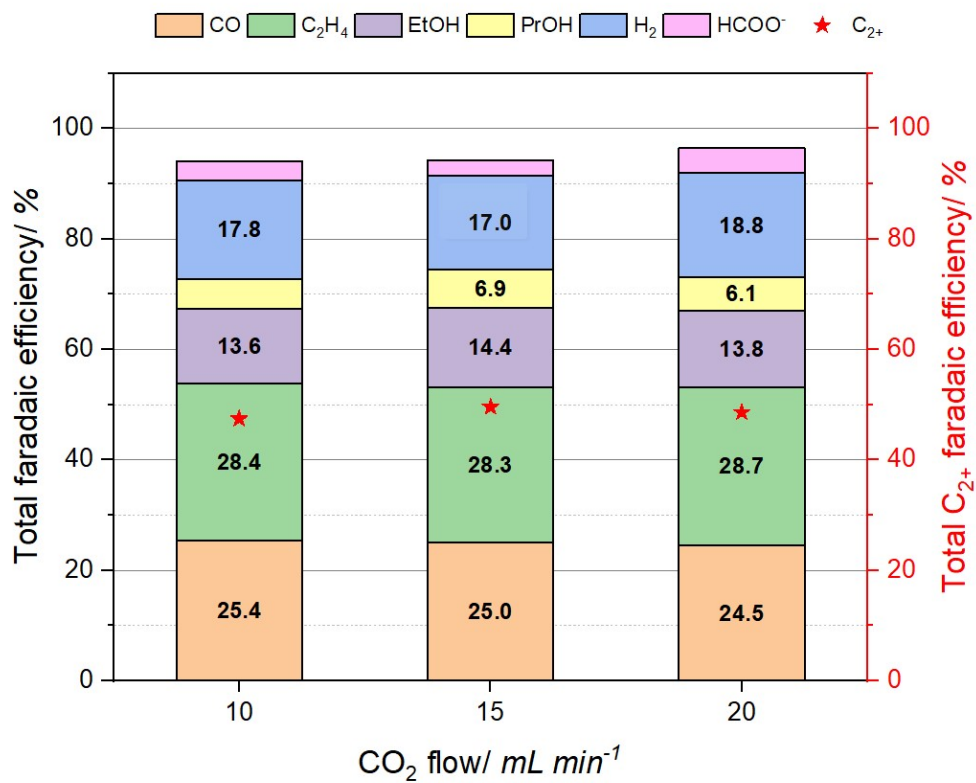

Figure S9. CO<sub>2</sub>RR at 150 mA cm<sup>-2</sup> with Cu<sub>2</sub>O-NC for different flow rates at pH 11

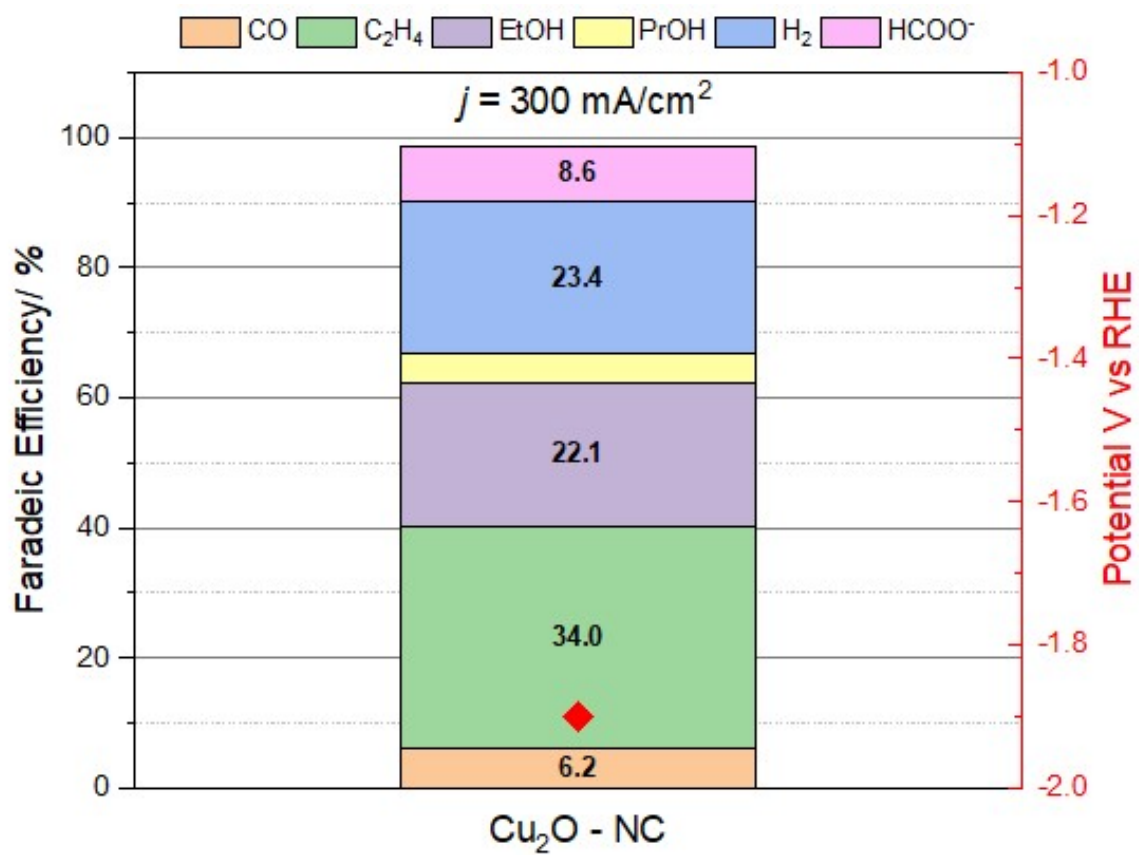

Figure S10. CO<sub>2</sub>RR at 300 mA cm<sup>-2</sup> with Cu<sub>2</sub>O-NC for 1 hour at pH 8.5

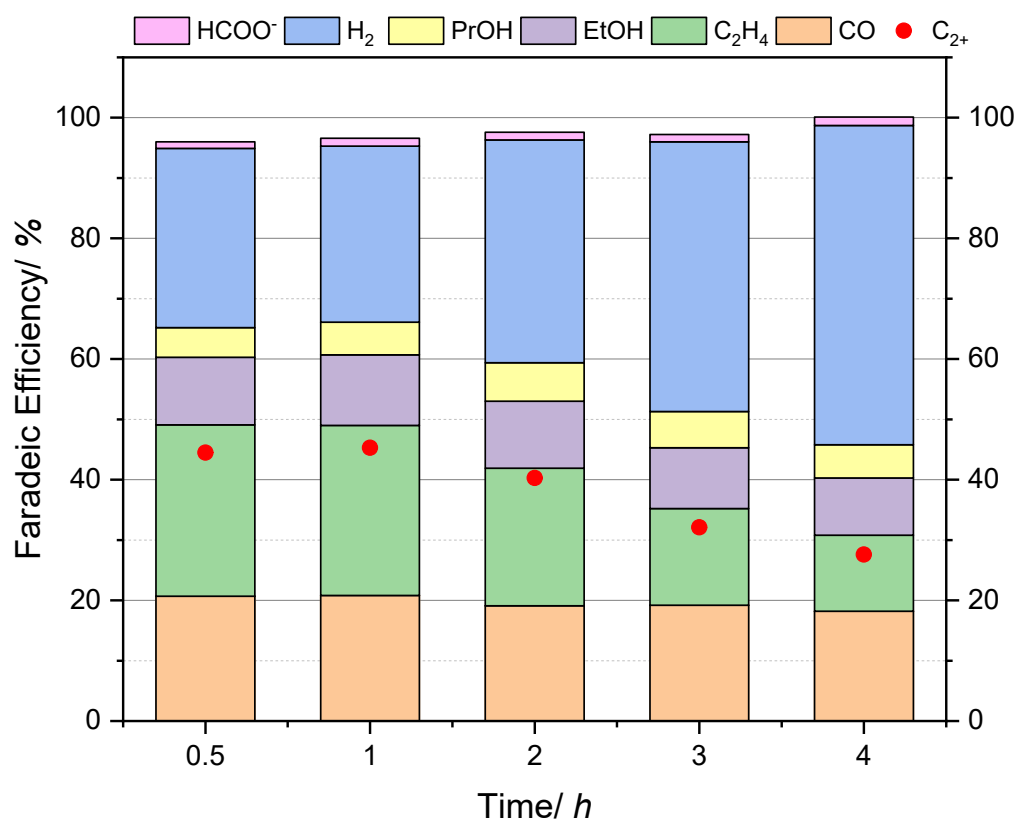

**Figure S11.** Long term stability test of Cu<sub>2</sub>O-NF, performed at 150 mA cm<sup>-2</sup> and pH 8.5. The different products are represented at each time interval along with total C<sub>2+</sub> FE.

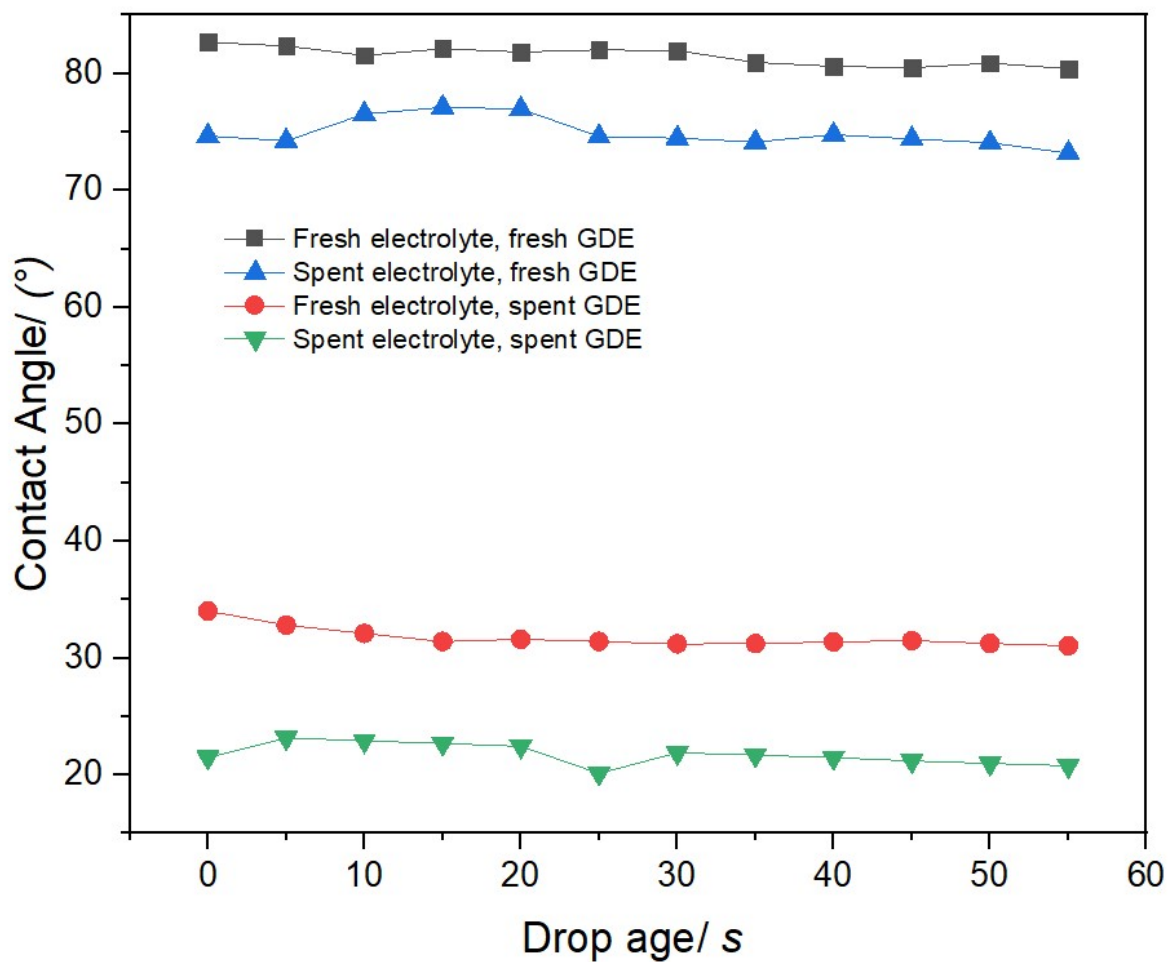

**Figure S12.** Contact angle measurements, off fresh and spent electrolyte on fresh and spent GDE

a)

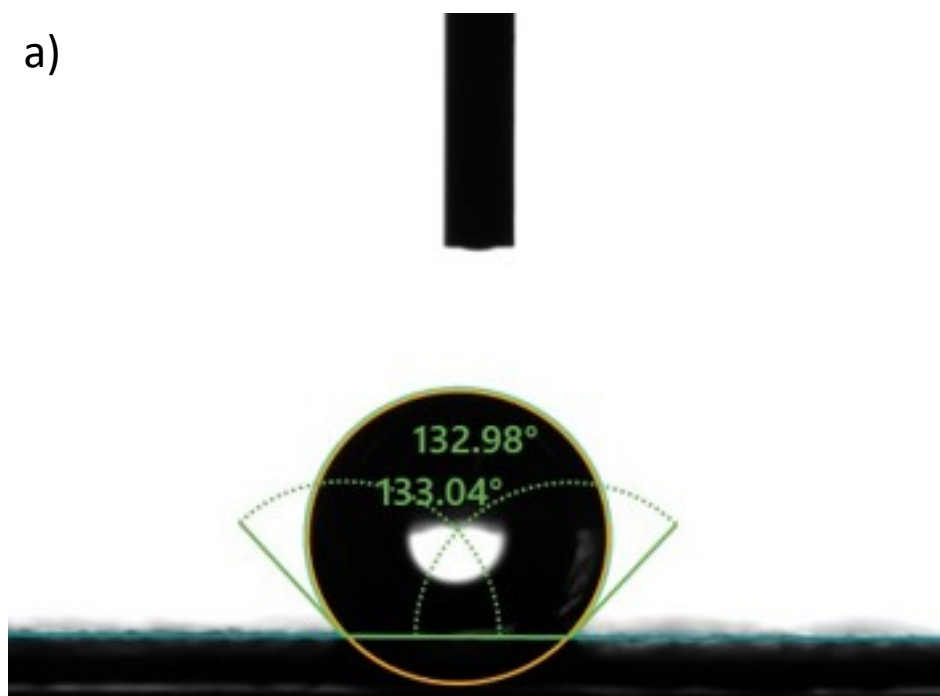

b)

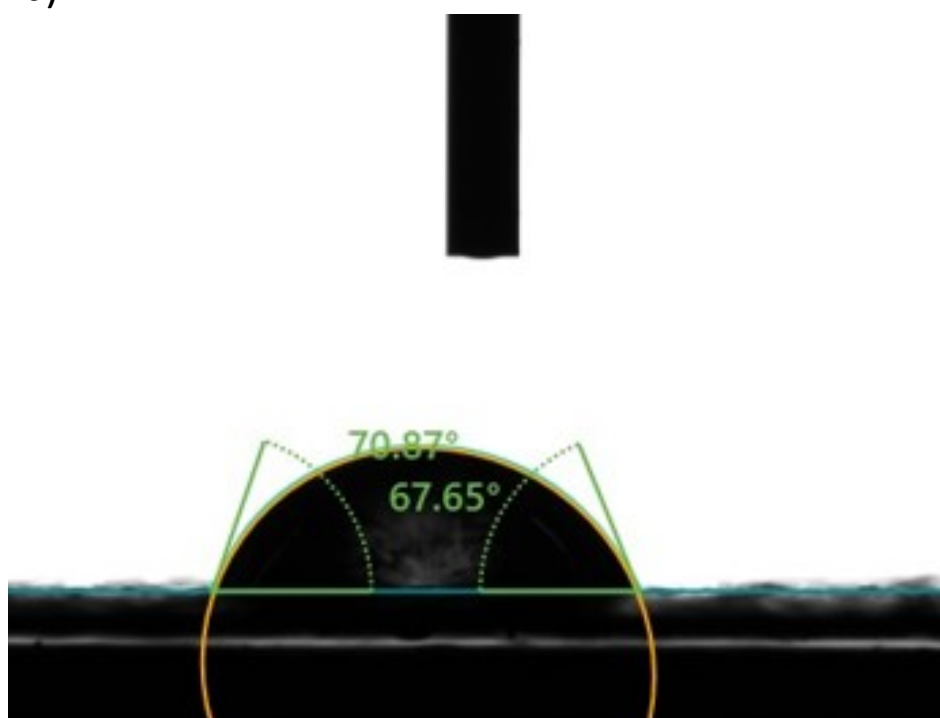

**Figure S13.** Contact angle measurements, on a) GDE coated  $\text{Cu}_2\text{O-NC}$  before electrolysis, and b) GDE coated  $\text{Cu}_2\text{O-NC}$  after electrolysis at  $150 \text{ mA cm}^{-2}$ . Both were measured after 5 seconds of droplet aging



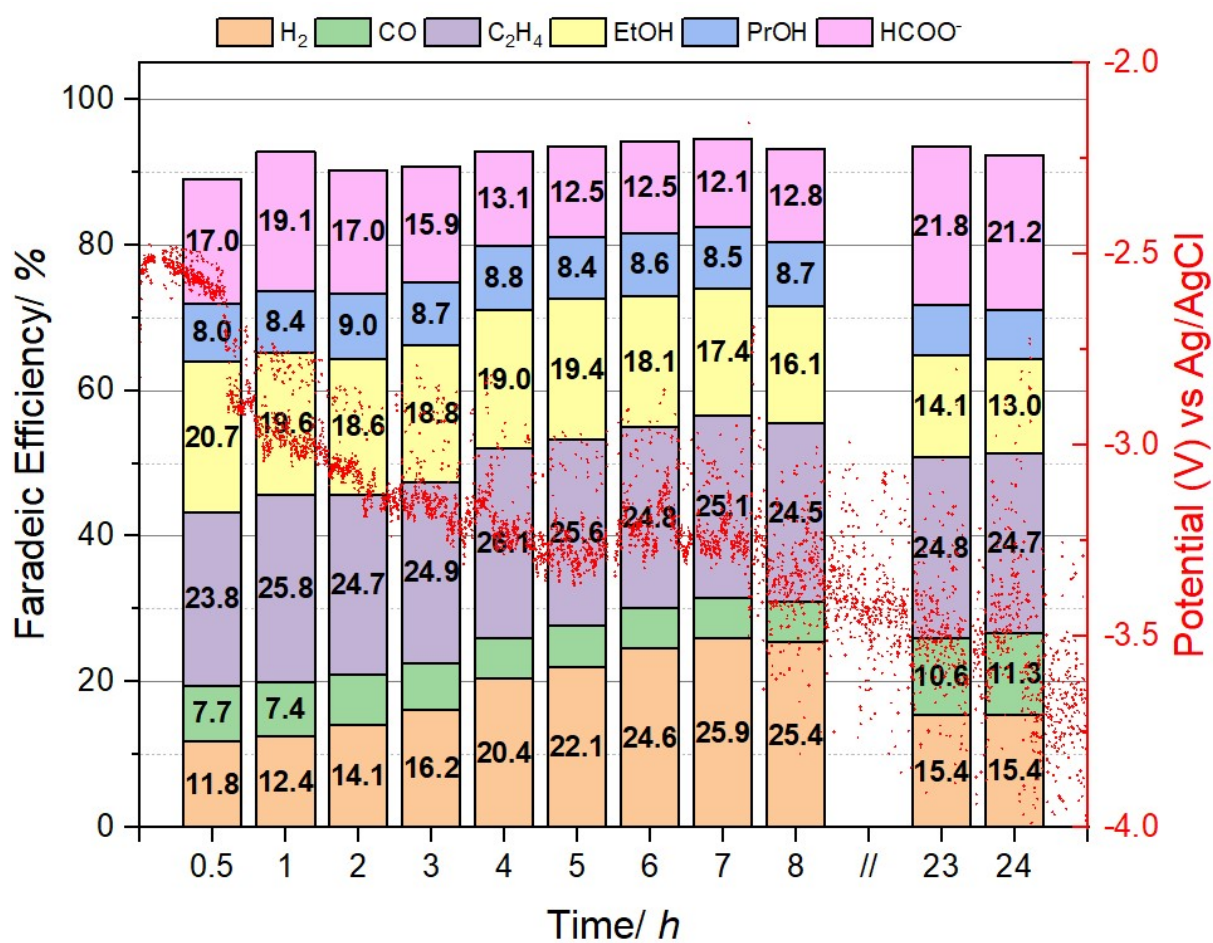

Figure S14. Long-term stability measurement with single pass 0.5 M KHCO<sub>3</sub> catholyte

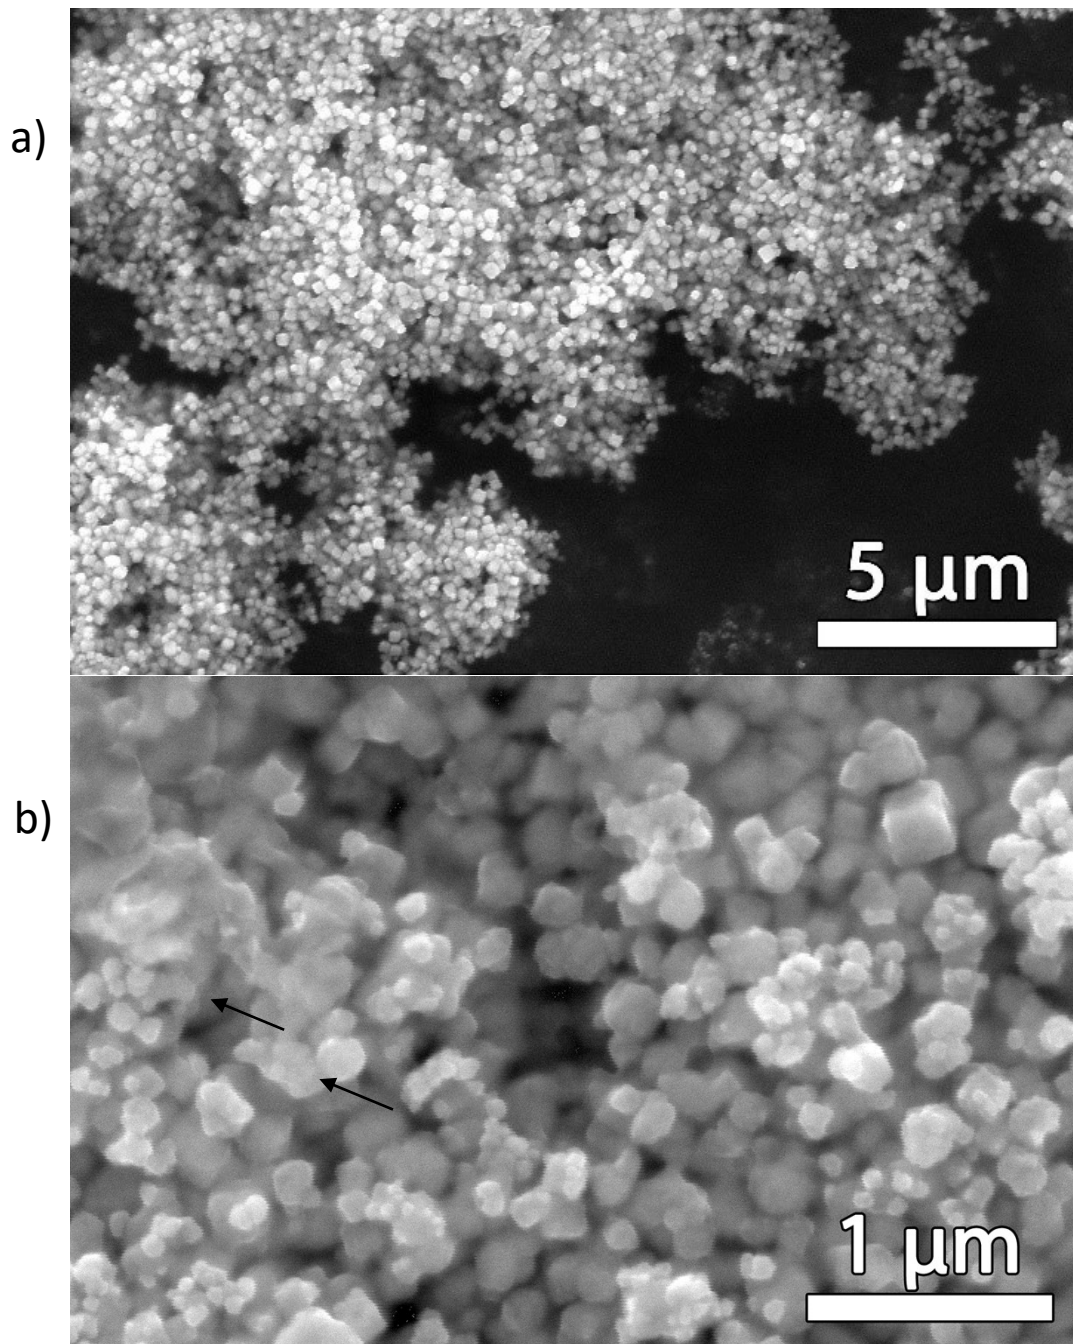

**Figure S15.** SEM measurements for Cu<sub>2</sub>O-NC, a) before electrolysis, and b) after electrolysis, with arrows indicating the roughening

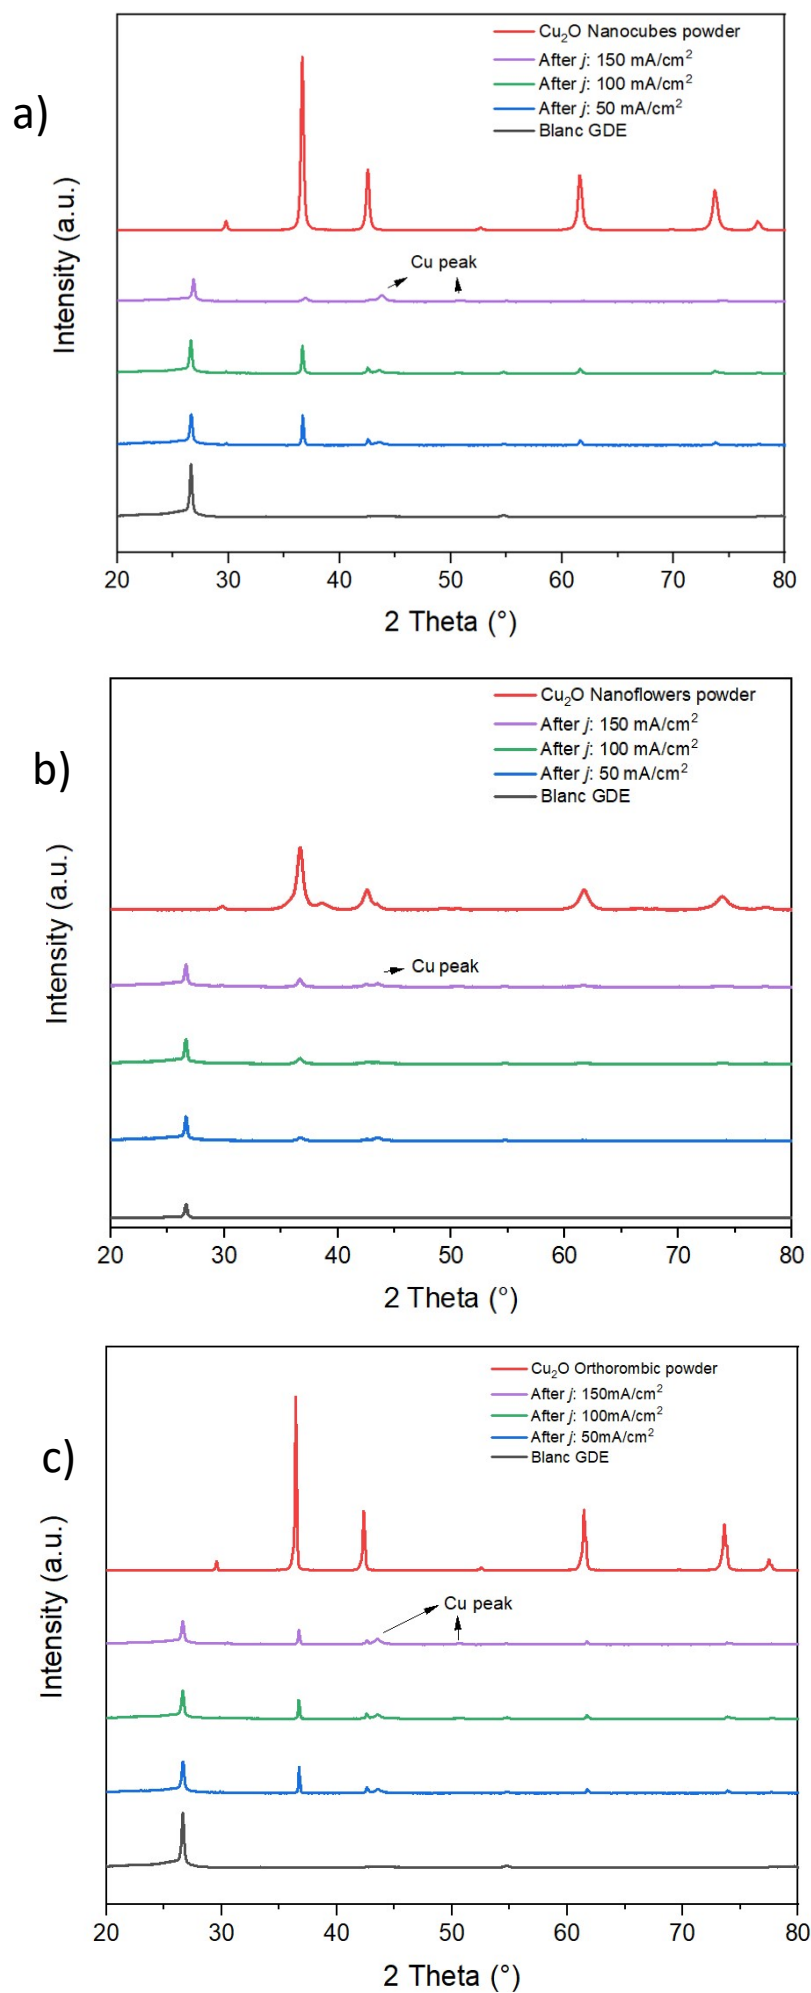

**Figure S16.** XRD spectra taken after electrolysis on GDE compared to the original powder. Spectra given after electrolysis of the different current densities. a)  $\text{Cu}_2\text{O}$ -NC, b)  $\text{Cu}_2\text{O}$ -NF, and  $\text{Cu}_2\text{O}$ -O
